# Supplementary material for: Low-carbohydrate diets containing plant-derived fat but not animal-derived fat ameliorate heart failure
Source: PubMed Central journal article supplement (PMC9998649; doi:10.1038/s41598-023-30821-7), 2023-03-09
Supplement: 41598_2023_30821_MOESM1_ESM.pdf [file 41598_2023_30821_MOESM1_ESM.pdf]

# **Low-carbohydrate diets containing plant-derived fat but not animal-derived fat ameliorate heart failure**

Satoshi Bujo<sup>1,2</sup>, Haruhiro Toko<sup>1\*</sup>, Kaoru Ito<sup>3</sup>, Satoshi Koyama<sup>3</sup>, Masato Ishizuka<sup>1</sup>, Masahiko Umei<sup>1</sup>, Haruka Yanagisawa-Murakami<sup>1</sup>, Jiaxi Guo<sup>1</sup>, Bowen Zhai<sup>1</sup>, Chunxia Zhao<sup>1</sup>, Risa Kishikawa<sup>1</sup>, Norifumi Takeda<sup>1</sup>, Kensuke Tsushima<sup>1</sup>, Yuichi Ikeda<sup>1,2</sup>, Eiki Takimoto<sup>1</sup>, Hiroyuki Morita<sup>1</sup>, Mutsuo Harada<sup>1,4</sup>, Issei Komuro<sup>1\*</sup>

<sup>1</sup> Department of Cardiovascular Medicine, Graduate School of Medicine, The University of Tokyo; Bunkyo-ku, Tokyo 113-8655, Japan

<sup>2</sup> Department of Advanced Translational Research and Medicine in Management of Pulmonary Hypertension, Graduate School of Medicine, The University of Tokyo; Bunkyo-ku, Tokyo 113-8655, Japan

<sup>3</sup> Laboratory for Cardiovascular Genomics and Informatics, RIKEN Center for Integrative Medical Sciences; Tsurumi-ku, Yokohama, Kanagawa 230-0045, Japan

<sup>4</sup> Department of Advanced Clinical Science and Therapeutics, Graduate School of Medicine, The University of Tokyo; Bunkyo-ku, Tokyo 113-8655, Japan

## **Supplementary information**

Supplementary Table 1. DEGs of TAC mice hearts between SD and LCD-A: Page 2-10

Supplementary Table 2. DEGs of TAC mice hearts between SD and LCD-P: Page 11-14

Supplementary Table 3. GO analysis data of TAC mice hearts between SD and LCD-A: Page 15-18

Supplementary Table 4. GO analysis data of TAC mice hearts between SD and LCD-P: Page 19-20

Supplementary Table 5. IPA data of TAC mice hearts between SD and LCD-P: Page 21-31

Supplementary Table 6. Sequences of the primers used for RT-qPCR: Page 32

Supplementary Figure 1. Food intake and serum triglyceride levels among diet groups: Page 33

**Supplementary Table 1. DEGs of TAC mice hearts between SD and LCD-A**

| gene          | log2FoldChange | pvalue   | adjusted pvalue |
|---------------|----------------|----------|-----------------|
| Mcm2          | 1.44806404     | 4.18E-18 | 5.90E-14        |
| Tuba1b        | 0.90462694     | 3.74E-13 | 2.64E-09        |
| Tecr1         | -1.2040106     | 6.21E-13 | 2.92E-09        |
| Actb          | 0.87193973     | 4.63E-12 | 1.63E-08        |
| Sult1a1       | -1.107468      | 5.82E-12 | 1.64E-08        |
| Art3          | -0.8737175     | 1.54E-11 | 3.63E-08        |
| Actg1         | 0.75281504     | 8.29E-11 | 1.64E-07        |
| Mcm3          | 1.35915583     | 9.31E-11 | 1.64E-07        |
| Thns12        | -0.7055768     | 1.98E-10 | 3.11E-07        |
| Fmo5          | -1.0309093     | 3.38E-10 | 4.76E-07        |
| Dpep1         | -0.9548035     | 4.88E-10 | 6.26E-07        |
| LOC102636514  | -0.7979552     | 1.14E-09 | 1.34E-06        |
| Ppip5k2       | -0.8801611     | 1.23E-09 | 1.34E-06        |
| Scara5        | -0.727569      | 1.55E-09 | 1.56E-06        |
| Lvrn          | -2.2314611     | 2.76E-09 | 2.60E-06        |
| Abat          | -0.8782682     | 3.25E-09 | 2.87E-06        |
| Agtppb1       | -0.6432437     | 4.72E-09 | 3.71E-06        |
| Prn           | 1.14023838     | 4.73E-09 | 3.71E-06        |
| Ccnd1         | 1.08810794     | 6.34E-09 | 4.44E-06        |
| Apln          | 2.02051494     | 6.37E-09 | 4.44E-06        |
| Sema5a        | -1.8495011     | 6.61E-09 | 4.44E-06        |
| Gdf15         | 2.63712957     | 8.66E-09 | 5.56E-06        |
| Mcm5          | 1.85338271     | 1.48E-08 | 8.62E-06        |
| Mcm6          | 1.07280825     | 1.53E-08 | 8.62E-06        |
| Pbld1         | -1.9065152     | 2.00E-08 | 1.08E-05        |
| Spry4         | 1.02711008     | 2.48E-08 | 1.30E-05        |
| Rgs2          | -0.8294098     | 3.13E-08 | 1.58E-05        |
| Aqp8          | 1.79236908     | 8.79E-08 | 4.28E-05        |
| 4732416N19Rik | -1.1504593     | 1.35E-07 | 6.34E-05        |
| Cript         | -0.5260802     | 2.93E-07 | 0.000130186     |
| Mturn         | -0.7261677     | 3.11E-07 | 0.000132944     |
| Plxnd1        | 0.88323181     | 3.24E-07 | 0.000134389     |
| Stab2         | -1.9047342     | 3.56E-07 | 0.000143423     |
| Rcc1          | 0.74563654     | 5.24E-07 | 0.000199894     |
| Tcf19         | 1.46460705     | 5.38E-07 | 0.000199894     |
| Pigp          | -0.5338674     | 6.16E-07 | 0.000223003     |
| Hn1l          | 1.00977722     | 7.47E-07 | 0.000261798     |
| Dcakd         | 0.66671375     | 8.40E-07 | 0.000261798     |
| Ptma          | 0.68036722     | 8.45E-07 | 0.000261798     |
| Spock2        | -2.0365447     | 8.48E-07 | 0.000261798     |

|               |            |          |             |
|---------------|------------|----------|-------------|
| Nes           | 1.30497704 | 8.53E-07 | 0.000261798 |
| Nme1          | 0.5897623  | 9.29E-07 | 0.000271746 |
| Pygo1         | -0.6482989 | 9.43E-07 | 0.000271746 |
| Nek7          | -0.6127778 | 9.91E-07 | 0.000279662 |
| Unc5a         | 0.93421893 | 1.02E-06 | 0.000283517 |
| Phyhd1        | -0.7422416 | 1.05E-06 | 0.000285188 |
| Mgst1         | -0.7395942 | 1.08E-06 | 0.00028788  |
| Hif3a         | -1.4052109 | 1.10E-06 | 0.00028788  |
| 3110057O12Rik | -0.8717524 | 1.16E-06 | 0.000293675 |
| Abca6         | -0.6648563 | 1.17E-06 | 0.000293675 |
| Cops2         | -0.5137813 | 1.69E-06 | 0.000403312 |
| Scgb1c1       | -1.2994642 | 1.70E-06 | 0.000403312 |
| Lig1          | 1.16945726 | 1.74E-06 | 0.000403312 |
| Gatsl2        | -0.6679612 | 1.91E-06 | 0.000428519 |
| Plk3          | 1.24614184 | 2.19E-06 | 0.000474604 |
| Slc12a3       | -2.4303216 | 2.42E-06 | 0.000509645 |
| C920006O11Rik | -0.9003587 | 2.56E-06 | 0.000531245 |
| Acss1         | -0.5649942 | 2.69E-06 | 0.000549505 |
| Ppm1k         | -0.5542591 | 2.87E-06 | 0.000575403 |
| Mtbp          | 0.83117729 | 2.90E-06 | 0.000575403 |
| Ssbp4         | 0.60290329 | 2.94E-06 | 0.000575403 |
| Sbk3          | -1.300312  | 3.05E-06 | 0.000588881 |
| Slc5a1        | -1.6170399 | 3.30E-06 | 0.000621231 |
| Ifi205        | -0.8150912 | 3.66E-06 | 0.000679898 |
| Tmtc1         | -1.0042868 | 3.72E-06 | 0.000681756 |
| Rrm1          | 0.65780973 | 4.07E-06 | 0.000735717 |
| Mfap1a        | -0.6245224 | 4.41E-06 | 0.000787208 |
| Isyna1        | -0.6671632 | 4.57E-06 | 0.000802569 |
| Tubb6         | 0.68281816 | 4.61E-06 | 0.000802569 |
| Shb           | 1.06370584 | 5.08E-06 | 0.000874074 |
| Plaur         | 1.21173199 | 5.41E-06 | 0.000920317 |
| Nae1          | -0.5394816 | 5.88E-06 | 0.000988371 |
| Ogdhl         | -0.6781764 | 6.19E-06 | 0.001027257 |
| Aldh6a1       | -0.5464697 | 6.57E-06 | 0.001072658 |
| Spc24         | 1.05856875 | 7.19E-06 | 0.001153691 |
| Actn4         | 0.51953895 | 7.70E-06 | 0.001220277 |
| Slc25a27      | -0.6642483 | 8.28E-06 | 0.001284811 |
| Slbp          | 0.54086465 | 9.26E-06 | 0.00138522  |
| Tmem71        | -0.8721488 | 9.32E-06 | 0.00138522  |
| Ypel3         | -0.7060519 | 9.64E-06 | 0.001389705 |
| Tspan9        | 0.91996618 | 9.95E-06 | 0.001403852 |
| Chpf          | 0.52736624 | 1.02E-05 | 0.00142386  |
| Lpl           | -0.5730926 | 1.15E-05 | 0.001572384 |

|               |            |          |             |
|---------------|------------|----------|-------------|
| 4930452B06Rik | 0.88801079 | 1.15E-05 | 0.001572384 |
| Gadd45g       | 1.03580468 | 1.17E-05 | 0.001589279 |
| Vwa1          | 0.93131947 | 1.24E-05 | 0.001666973 |
| Tubb5         | 0.73054723 | 1.33E-05 | 0.001751341 |
| Csf1          | 0.90478789 | 1.34E-05 | 0.001751341 |
| Mxi1          | -0.5747935 | 1.38E-05 | 0.001783684 |
| Traf3         | 0.5777148  | 1.56E-05 | 0.001998432 |
| Ift122        | 1.07571539 | 1.74E-05 | 0.002168767 |
| Timp4         | -0.7433385 | 1.84E-05 | 0.002260432 |
| Uhrf1         | 1.86651651 | 1.84E-05 | 0.002260432 |
| Dnmt1         | 0.73521836 | 1.86E-05 | 0.002261764 |
| Irf2bpl       | 0.53494552 | 1.99E-05 | 0.002375105 |
| Ncapd2        | 0.79456284 | 2.02E-05 | 0.002394861 |
| Arc           | 1.935745   | 2.04E-05 | 0.002402249 |
| Inmt          | -2.7382163 | 2.11E-05 | 0.002458421 |
| Myh9          | 0.85440691 | 2.53E-05 | 0.002831778 |
| 4831440E17Rik | -0.8800721 | 2.55E-05 | 0.002831778 |
| Ier2          | 0.98699748 | 2.64E-05 | 0.002903438 |
| Pidd1         | 1.21412882 | 2.76E-05 | 0.002979466 |
| Dpyd          | -0.6201478 | 2.77E-05 | 0.002979466 |
| Mcam          | 0.9915238  | 2.82E-05 | 0.002995528 |
| Acta2         | 1.1712618  | 2.90E-05 | 0.003058871 |
| Slc22a12      | -2.4320284 | 2.95E-05 | 0.003076703 |
| Pole          | 0.83641715 | 3.07E-05 | 0.003099442 |
| Mettl20       | -0.8342695 | 3.26E-05 | 0.003221256 |
| Wdr45         | -0.615466  | 3.29E-05 | 0.003226341 |
| Mesdc1        | 0.87803105 | 3.34E-05 | 0.003239094 |
| Ralb          | 0.5444479  | 3.37E-05 | 0.003239094 |
| Ddx39         | 0.53647368 | 3.37E-05 | 0.003239094 |
| Galnt15       | -0.9265624 | 3.51E-05 | 0.003323333 |
| Slc37a1       | -0.5564985 | 3.58E-05 | 0.003348801 |
| Dpysl5        | -1.7172438 | 3.67E-05 | 0.003411524 |
| Arrdc5        | -2.1892156 | 3.72E-05 | 0.003427505 |
| Asf1b         | 1.50682315 | 3.93E-05 | 0.003508696 |
| Tubb2a        | 0.65819907 | 4.08E-05 | 0.003594785 |
| Jade2         | -0.6881716 | 4.13E-05 | 0.003623817 |
| Junb          | 1.06868323 | 4.17E-05 | 0.003628588 |
| Urm1          | 0.51839768 | 4.33E-05 | 0.003745925 |
| Chaf1a        | 1.02335874 | 4.38E-05 | 0.003771516 |
| Ppp1r14a      | 0.92381414 | 4.51E-05 | 0.003859669 |
| Ace2          | -0.9810307 | 4.55E-05 | 0.003866483 |
| Hist1h1c      | -1.2225699 | 4.60E-05 | 0.003889303 |
| Tmem179       | -1.1238606 | 4.95E-05 | 0.004102433 |

|               |            |             |             |
|---------------|------------|-------------|-------------|
| Aebp1         | 0.93876064 | 5.39E-05    | 0.004324381 |
| Rasip1        | 0.51589917 | 5.51E-05    | 0.004394727 |
| Cux2          | 0.63844469 | 5.64E-05    | 0.004471743 |
| Gm16793       | 0.67403437 | 5.97E-05    | 0.004679851 |
| Gimap9        | 0.97722557 | 6.05E-05    | 0.004692873 |
| Nt5c3         | -0.721075  | 6.20E-05    | 0.004755648 |
| Zfp445        | -0.5721853 | 6.27E-05    | 0.004784834 |
| Pola1         | 0.8235971  | 6.32E-05    | 0.004791932 |
| Klhl11        | -0.7088785 | 6.63E-05    | 0.005002884 |
| Flnc          | 0.58829137 | 7.02E-05    | 0.005235161 |
| Cul4b         | -0.5640905 | 7.05E-05    | 0.005235161 |
| Map7          | -0.9444856 | 7.74E-05    | 0.005692781 |
| Slc25a25      | 0.82431155 | 8.36E-05    | 0.006053403 |
| Paqr6         | -3.2128114 | 8.98E-05    | 0.006434979 |
| Arl4a         | -0.5533294 | 9.31E-05    | 0.006604019 |
| Akap5         | 1.1246611  | 9.37E-05    | 0.006610211 |
| Zfp943        | -0.7875374 | 9.92E-05    | 0.006967544 |
| Wdhd1         | 1.20665683 | 0.00010608  | 0.007302941 |
| Bnip3         | -1.3349926 | 0.000107648 | 0.007374965 |
| Fmo2          | -1.722481  | 0.000115866 | 0.007749873 |
| Megf11        | 1.4430968  | 0.000119849 | 0.007978451 |
| Adam19        | 0.84369404 | 0.000125611 | 0.008322788 |
| Chaf1b        | 1.88479693 | 0.000132944 | 0.008662869 |
| Zfp229        | -0.6240503 | 0.000133199 | 0.008662869 |
| Tfrc          | 0.96095075 | 0.00013845  | 0.008922146 |
| Egr1          | 1.98476044 | 0.00014516  | 0.009145733 |
| Atad2         | 1.22285535 | 0.000148841 | 0.009297963 |
| Xdh           | -0.785894  | 0.000148894 | 0.009297963 |
| Arhgap5       | -0.5741688 | 0.000149636 | 0.009303168 |
| Tgfb1i1       | 0.72096754 | 0.000150694 | 0.009327812 |
| Ppp1r3a       | -0.5192999 | 0.000151545 | 0.009339545 |
| Lgals1        | 0.60602609 | 0.000153994 | 0.009449195 |
| Trp53         | 0.66197308 | 0.000156068 | 0.009535029 |
| Thbs1         | 1.18957671 | 0.000159001 | 0.009672305 |
| Abcb1a        | -0.5944556 | 0.000160394 | 0.00970355  |
| Peg3os        | -1.0758899 | 0.00016362  | 0.009764008 |
| D630039A03Rik | -1.4560486 | 0.000164517 | 0.009764008 |
| Wdr90         | 0.82677576 | 0.000164659 | 0.009764008 |
| Egfl7         | 0.5376315  | 0.00016848  | 0.00994877  |
| 1010001N08Rik | -0.5014924 | 0.000179043 | 0.010484767 |
| Camk2n1       | -0.6216115 | 0.000188688 | 0.010900367 |
| Ccl7          | 2.0582553  | 0.000190001 | 0.010900367 |
| Smg9          | 0.52372577 | 0.000193483 | 0.011010591 |

|               |            |             |             |
|---------------|------------|-------------|-------------|
| Amigo2        | -0.6546678 | 0.00019518  | 0.011043994 |
| Arhgap20      | -0.5141036 | 0.000197168 | 0.011043994 |
| Myom2         | -0.9315473 | 0.0001972   | 0.011043994 |
| Trim23        | -0.5976004 | 0.000200162 | 0.01116554  |
| Rnase1        | -1.6944449 | 0.00021869  | 0.01205614  |
| Zfp800        | -0.5920626 | 0.000219972 | 0.012073334 |
| Pola2         | 0.57599916 | 0.000220713 | 0.012073334 |
| Cchcr1        | 0.78368707 | 0.000228358 | 0.012443326 |
| Zfp950        | -0.5264695 | 0.000236102 | 0.012717943 |
| Peg3          | -0.9100302 | 0.000242177 | 0.012849033 |
| Tmem19        | -0.5008675 | 0.000245327 | 0.012967419 |
| D830032E09Rik | -0.7651368 | 0.000255584 | 0.013261225 |
| Lmnb2         | 1.16379805 | 0.000265044 | 0.013580657 |
| Ints2         | 0.9279636  | 0.000265371 | 0.013580657 |
| Apoa4         | -2.822359  | 0.000266362 | 0.013580657 |
| Bmp6          | -0.5501135 | 0.000267855 | 0.01359797  |
| 1810055G02Rik | 0.81988486 | 0.000272088 | 0.013763376 |
| Tbx5          | -0.8064522 | 0.000281779 | 0.014052095 |
| Dysf          | 0.66225194 | 0.000295274 | 0.014419386 |
| Csrp1         | 0.50770259 | 0.000315221 | 0.015183316 |
| C330022C24Rik | -1.2205631 | 0.000324482 | 0.015560374 |
| Prdm1         | 1.23893785 | 0.000328697 | 0.015631089 |
| Zfp52         | -0.7957751 | 0.000329657 | 0.015631089 |
| Pcp4l1        | -0.7672667 | 0.00033616  | 0.015866962 |
| Pnpla7        | -1.0260845 | 0.000342344 | 0.016104983 |
| Fos           | 1.91851992 | 0.000347663 | 0.016250944 |
| Crocc         | 0.67785502 | 0.000355347 | 0.016551218 |
| Syn2          | -0.819735  | 0.00035827  | 0.01663244  |
| Adamts17      | 1.32272732 | 0.000362074 | 0.016657597 |
| Apoa          | -0.7325726 | 0.00036455  | 0.016704213 |
| Cfh           | -0.5563415 | 0.000366198 | 0.016723623 |
| Arhgef19      | 0.60826582 | 0.000367344 | 0.016723623 |
| H2afz         | 0.68564187 | 0.000373922 | 0.016913965 |
| Trnp1         | -0.9645641 | 0.000384992 | 0.017165884 |
| Bcl2l1        | -1.0281043 | 0.000386654 | 0.017165884 |
| Naa30         | -0.5225144 | 0.00039678  | 0.017433065 |
| Cdo1          | -2.1292112 | 0.000398738 | 0.017433065 |
| Dll4          | 0.59391687 | 0.0004033   | 0.017513157 |
| Ankrd23       | 0.71731468 | 0.000407431 | 0.017584303 |
| Dtx1          | -1.3512803 | 0.000425797 | 0.018260771 |
| Slc10a6       | -1.2686982 | 0.000427367 | 0.018260771 |
| Cdc6          | 1.86828321 | 0.000443164 | 0.01855897  |
| Gins2         | 1.42197696 | 0.00045665  | 0.019010933 |

|          |            |             |             |
|----------|------------|-------------|-------------|
| Cyp26b1  | -1.3735793 | 0.000458954 | 0.019031269 |
| Serinc3  | -0.5568591 | 0.000463903 | 0.019082037 |
| Cdc37l1  | -0.5001742 | 0.000467514 | 0.019124693 |
| Alg6     | -0.5766714 | 0.000477194 | 0.019408175 |
| Nudt1    | 0.56852221 | 0.000479113 | 0.019430242 |
| Cfl1     | 0.67810969 | 0.000490562 | 0.01978088  |
| Dus4l    | -0.5815531 | 0.000494153 | 0.019812465 |
| Mfsd7c   | -0.6763717 | 0.000501615 | 0.019829937 |
| Trim16   | 0.55637212 | 0.000506768 | 0.01987832  |
| Fen1     | 0.7266875  | 0.000507064 | 0.01987832  |
| Gm14420  | -0.6856388 | 0.00050888  | 0.019894235 |
| Ttyh2    | 0.94366978 | 0.000519044 | 0.020179801 |
| Mtfp1    | 0.60715368 | 0.000521838 | 0.020232679 |
| Cd46     | -1.4283979 | 0.000531664 | 0.020501032 |
| Smarcb1  | 0.56553242 | 0.000545675 | 0.02080098  |
| Tk1      | 1.57047157 | 0.000546812 | 0.02080098  |
| Rbl2     | -0.6727233 | 0.000605726 | 0.022629914 |
| Flna     | 0.63975776 | 0.000606314 | 0.022629914 |
| Asb11    | -0.6054732 | 0.000607719 | 0.022629914 |
| Rnpc3    | -0.7772285 | 0.000610404 | 0.022635531 |
| Apc2     | 0.88702933 | 0.000619466 | 0.022852083 |
| Zrsr1    | -0.5293649 | 0.000622016 | 0.022852083 |
| Rnaseh2c | 0.63079139 | 0.000640239 | 0.023348054 |
| Zfp654   | -0.568067  | 0.000645897 | 0.023493678 |
| Tonsl    | 1.04327306 | 0.000664201 | 0.023974092 |
| Scml4    | 1.60498831 | 0.000681948 | 0.024489399 |
| Polr3h   | -0.5013734 | 0.000689572 | 0.02464985  |
| Dok2     | 0.98841265 | 0.000694698 | 0.024695679 |
| Cytl1    | -0.7325043 | 0.000695201 | 0.024695679 |
| Ptbp1    | 0.55057493 | 0.000696442 | 0.024695679 |
| Tyms     | 1.74573341 | 0.000707128 | 0.024949261 |
| Nadk2    | -0.5210797 | 0.000711973 | 0.024995222 |
| Wfikkn2  | -0.6124106 | 0.000718254 | 0.025090877 |
| Iqcb1    | -0.617043  | 0.000729703 | 0.02521686  |
| Mustn1   | -0.6096318 | 0.00076499  | 0.02607803  |
| Dctd     | 0.99154251 | 0.000778653 | 0.026330831 |
| Unc13a   | -0.8062432 | 0.000779869 | 0.026330831 |
| Gimap6   | 0.5157182  | 0.000782713 | 0.026359857 |
| Sall2    | 0.93275407 | 0.000784464 | 0.026359857 |
| Spata13  | 0.58655034 | 0.000794599 | 0.02659651  |
| Vwa3a    | -0.5317111 | 0.000795276 | 0.02659651  |
| Lgalsl   | -0.5190205 | 0.00082054  | 0.02731198  |
| Crtap    | 0.57668448 | 0.000824197 | 0.027369154 |

|          |            |             |             |
|----------|------------|-------------|-------------|
| Fam117b  | -0.6446934 | 0.00083227  | 0.027531492 |
| Tsc22d3  | -0.6037846 | 0.000832998 | 0.027531492 |
| Prim2    | 0.85492122 | 0.000834938 | 0.027531492 |
| Fam107a  | -1.4004723 | 0.000842687 | 0.027699379 |
| S100a16  | 0.50882921 | 0.000843955 | 0.027699379 |
| Ripk3    | 1.19927932 | 0.000855079 | 0.027934574 |
| Tpm4     | 0.88489292 | 0.000864693 | 0.028136531 |
| Zfp946   | -0.618868  | 0.000869051 | 0.028136531 |
| Dixdc1   | -0.9034783 | 0.000869516 | 0.028136531 |
| Etv4     | 2.08051458 | 0.000876911 | 0.028136531 |
| Diap2    | -0.5111788 | 0.000877211 | 0.028136531 |
| Amn1     | -0.6149765 | 0.000880371 | 0.028173746 |
| Sik1     | 0.82316205 | 0.000912477 | 0.028670027 |
| Fam161b  | -0.5213468 | 0.000918221 | 0.028670027 |
| Ptprs    | 0.58130489 | 0.000922734 | 0.028747338 |
| Cdca7    | 1.33128661 | 0.000939247 | 0.029069268 |
| Chrd     | -0.5068741 | 0.000944736 | 0.029142742 |
| Fign     | -0.9559368 | 0.00094575  | 0.029142742 |
| Lgals9   | 1.02443361 | 0.00096057  | 0.029287419 |
| Myo5c    | -0.5373314 | 0.000960822 | 0.029287419 |
| Cdt1     | 1.33630732 | 0.000988856 | 0.029747633 |
| Tuba1a   | 0.70025596 | 0.000994699 | 0.029775139 |
| Tbxa2r   | 1.13149991 | 0.00099581  | 0.029775139 |
| Myot     | -0.7503417 | 0.001020276 | 0.030442199 |
| Pcdhb22  | 0.707139   | 0.001039825 | 0.030871075 |
| Tagap    | -1.1822508 | 0.001043049 | 0.030871075 |
| Tomm5    | 0.50691484 | 0.001052016 | 0.03093145  |
| Myl6     | 0.60808778 | 0.001067772 | 0.031223863 |
| Ctsl     | -0.7352928 | 0.001069421 | 0.031223863 |
| N4bp2l1  | -1.2175271 | 0.001074833 | 0.03127654  |
| Ifitm3   | 0.91992094 | 0.001097611 | 0.031808169 |
| Bcl6b    | 1.03423423 | 0.001107237 | 0.032021387 |
| Ccng2    | -0.7276263 | 0.001134518 | 0.032211199 |
| Tcp11l2  | -0.7258191 | 0.001137105 | 0.032211199 |
| Tm2d1    | -0.5225887 | 0.001138926 | 0.032211199 |
| Ntn1     | -0.5139756 | 0.001177104 | 0.032637453 |
| Ppargc1b | 0.71747266 | 0.001207571 | 0.033221162 |
| Nos3     | 0.5051366  | 0.001218337 | 0.033337305 |
| Gdf6     | 1.63754627 | 0.001226342 | 0.033476535 |
| Zcwpw1   | 1.25256307 | 0.001237092 | 0.033639845 |
| Itgb3bp  | -0.6366654 | 0.001273882 | 0.034573641 |
| Preld1   | 0.62063779 | 0.00128234  | 0.034669847 |
| Sipa1    | 0.636309   | 0.001286438 | 0.034714147 |



|          |            |             |             |
|----------|------------|-------------|-------------|
| Unc5b    | 0.83555169 | 0.001306661 | 0.035051547 |
| Kdelr2   | 0.50548007 | 0.00133172  | 0.03532812  |
| AA388235 | -0.9912709 | 0.001346318 | 0.035596336 |
| Rgs16    | 1.08740281 | 0.001354643 | 0.035710936 |
| Otud1    | 1.50261283 | 0.001356272 | 0.035710936 |
| Hirip3   | 0.61704975 | 0.001419794 | 0.036640009 |
| Alpl     | 0.89680018 | 0.001420115 | 0.036640009 |
| F2rl1    | 1.20725489 | 0.001424202 | 0.036655552 |
| Pald1    | 0.53883454 | 0.001432762 | 0.036735532 |
| Cbr2     | 0.88844917 | 0.001434229 | 0.036735532 |
| Rfc5     | 0.91322547 | 0.001442406 | 0.036811347 |
| Cdc45    | 0.65779576 | 0.001455468 | 0.036968265 |
| Abca5    | -0.5571019 | 0.0014567   | 0.036968265 |
| Sh3d21   | -0.6198564 | 0.001460876 | 0.036968265 |
| Ckap4    | 0.57449611 | 0.00146951  | 0.036968265 |
| Fam179a  | 1.15206796 | 0.001522499 | 0.037762804 |
| Tfdp2    | -0.8347471 | 0.001532819 | 0.037865007 |
| Lpcat1   | 0.51798256 | 0.001534669 | 0.037865007 |
| Abcg1    | 0.91132593 | 0.001557165 | 0.038153253 |
| Kcnd3    | -0.5951155 | 0.001585484 | 0.038579198 |
| Styx     | -0.5966648 | 0.001601781 | 0.038700334 |
| Bax      | 0.52478434 | 0.001604343 | 0.038700334 |
| Dpm1     | -0.5619632 | 0.001606915 | 0.038700334 |
| Tigd5    | -0.6188753 | 0.001614289 | 0.038811686 |
| Oasl1    | 1.49285204 | 0.001682177 | 0.039967288 |
| Atxn10   | -0.5330911 | 0.001694368 | 0.040189261 |
| Dusp6    | 0.5944     | 0.001711547 | 0.040460733 |
| Ezh1     | -0.6533806 | 0.001725467 | 0.040653606 |
| Sh3rf2   | -0.6124671 | 0.001744155 | 0.040957163 |
| Pik3r1   | -0.8883435 | 0.001750146 | 0.041029586 |
| Pnmt     | -1.7296382 | 0.001776038 | 0.041361765 |
| Aldob    | -1.4229854 | 0.001785343 | 0.041448854 |
| Hey2     | -0.7366952 | 0.001791526 | 0.041448854 |
| Zfp808   | -1.2082406 | 0.001814057 | 0.041781405 |
| 9-Sep    | 0.63951834 | 0.001817741 | 0.041781405 |
| Gpr160   | -0.6707277 | 0.001831366 | 0.04189643  |
| Tspyl4   | -0.6557353 | 0.00183462  | 0.04189643  |
| Nrarp    | 0.9080253  | 0.001859193 | 0.04232062  |
| Fkbp5    | -1.4059334 | 0.001871129 | 0.042425441 |
| Tfec     | 2.12809826 | 0.00187824  | 0.042425441 |
| Plk2     | 0.58146739 | 0.001950596 | 0.043696436 |
| Syne4    | -2.0506576 | 0.001974383 | 0.044142822 |
| Egr2     | 1.57068583 | 0.002000964 | 0.044471823 |

|               |            |             |             |
|---------------|------------|-------------|-------------|
| Igfbp6        | -0.5547504 | 0.002009805 | 0.044598073 |
| Sema3f        | 0.89929273 | 0.002034684 | 0.044867955 |
| Gfra2         | 1.20388639 | 0.002073649 | 0.045513857 |
| Prnd          | 2.24915006 | 0.002106451 | 0.045877063 |
| Gm13889       | 0.78528518 | 0.002197555 | 0.047062362 |
| Chtf18        | 0.96582428 | 0.002216788 | 0.047265516 |
| Egr3          | 1.63439715 | 0.002217089 | 0.047265516 |
| Relb          | 0.51757034 | 0.002226989 | 0.047404965 |
| Akap12        | 0.52887388 | 0.002241809 | 0.047515748 |
| Penk          | -1.2003109 | 0.002248279 | 0.047515748 |
| Fbxl22        | 0.62350006 | 0.002251204 | 0.047515748 |
| S1pr3         | 0.61821995 | 0.002253389 | 0.047515748 |
| Dusp26        | -2.0321469 | 0.002280412 | 0.047679188 |
| 1810041L15Rik | 1.42407916 | 0.002294279 | 0.047777896 |
| Prim1         | 1.12225102 | 0.002321735 | 0.048115496 |
| Eef2k         | -0.5323721 | 0.002327307 | 0.048142329 |
| Creb3l1       | 0.81140803 | 0.002336963 | 0.048142329 |
| Gas2l3        | 1.01182337 | 0.002337202 | 0.048142329 |
| Pkmyt1        | 0.56389256 | 0.002349746 | 0.048200533 |
| Csdc2         | -0.5595805 | 0.002368535 | 0.048515431 |
| Fam150b       | -1.5419283 | 0.002409123 | 0.049061981 |
| Rpp40         | -0.7429875 | 0.002503389 | 0.049901589 |

**Supplementary Table 2. DEGs of TAC mice hearts between SD and LCD-P**

| gene          | log2FoldChange | pvalue   | adjusted pvalue |
|---------------|----------------|----------|-----------------|
| Tpst2         | 0.52694576     | 1.54E-11 | 1.69E-07        |
| Lamp2         | -0.5250519     | 7.11E-10 | 3.90E-06        |
| Tecrl         | -1.0164891     | 1.23E-09 | 4.50E-06        |
| Smpd1         | 0.63857205     | 1.23E-08 | 3.38E-05        |
| Tmem126a      | -0.5427772     | 2.45E-08 | 4.48E-05        |
| Tbc1d19       | -0.6679687     | 2.15E-08 | 4.48E-05        |
| Dbi           | 0.54592438     | 5.62E-08 | 8.81E-05        |
| Ttc14         | -0.5596262     | 1.09E-07 | 0.000132967     |
| Zfp260        | -0.6256912     | 1.26E-07 | 0.000137943     |
| Kifc3         | 0.72503347     | 2.32E-07 | 0.00021195      |
| Pnpt1         | -0.5020201     | 3.63E-07 | 0.000307008     |
| Ppm1k         | -0.5982409     | 4.76E-07 | 0.000348156     |
| Pgap1         | -0.9814339     | 4.52E-07 | 0.000348156     |
| Sema7a        | 0.60322389     | 8.56E-07 | 0.000540373     |
| Xpo1          | -0.9324618     | 8.86E-07 | 0.000540373     |
| Cxadr         | -0.5650396     | 8.42E-07 | 0.000540373     |
| Tesc          | 0.74157477     | 1.30E-06 | 0.000682292     |
| Eps8          | 0.60975449     | 1.95E-06 | 0.000961063     |
| Abat          | -0.6923644     | 3.02E-06 | 0.001226356     |
| Scn5a         | 0.57929437     | 3.21E-06 | 0.001257547     |
| Akt1          | 0.53202771     | 3.62E-06 | 0.001363309     |
| Grasp         | 0.60337721     | 3.95E-06 | 0.001400113     |
| Slc2a4rg-ps   | -0.7307457     | 4.64E-06 | 0.001456447     |
| Zbtb22        | 0.53256894     | 4.55E-06 | 0.001456447     |
| Mroh1         | 0.57832806     | 5.06E-06 | 0.001499088     |
| Zfp397        | -0.5076038     | 5.32E-06 | 0.001499088     |
| B230354K17Rik | -0.7260838     | 5.21E-06 | 0.001499088     |
| Zfp950        | -0.6530315     | 5.63E-06 | 0.001545917     |
| Pth1r         | 0.69932334     | 7.36E-06 | 0.001759459     |
| Naa30         | -0.6653677     | 7.52E-06 | 0.001759459     |
| Kctd21        | -0.9564388     | 7.17E-06 | 0.001759459     |
| Uty           | -0.8502323     | 8.53E-06 | 0.001950593     |
| Hk1           | 0.54860343     | 8.93E-06 | 0.001982872     |
| Zfp943        | -0.8985405     | 9.62E-06 | 0.002032663     |
| Plekhm2       | 0.55361598     | 1.16E-05 | 0.002284573     |
| Mir22hg       | 0.98756254     | 1.47E-05 | 0.00265211      |
| Slc25a36      | -0.7221795     | 1.90E-05 | 0.003255125     |
| Chml          | -0.55118       | 2.32E-05 | 0.003769782     |
| 3110057O12Rik | -0.7582583     | 2.37E-05 | 0.003769782     |
| Zfp101        | -0.986473      | 2.34E-05 | 0.003769782     |

|               |            |             |             |
|---------------|------------|-------------|-------------|
| Kbtbd3        | -0.8402623 | 2.46E-05    | 0.003841163 |
| Ip6k3         | 1.2225862  | 2.53E-05    | 0.003861519 |
| Zfpm1         | 0.52683505 | 3.41E-05    | 0.004737074 |
| Klhl28        | -0.5408494 | 3.63E-05    | 0.004976507 |
| Acaa2         | 0.64611784 | 3.67E-05    | 0.004976507 |
| Lrp11         | -0.7066007 | 4.11E-05    | 0.005254136 |
| Pgp           | 0.52136517 | 4.36E-05    | 0.00550484  |
| Klhl31        | -0.5492592 | 4.49E-05    | 0.005538757 |
| Tatdn2        | 0.56982859 | 4.47E-05    | 0.005538757 |
| 2610305D13Rik | -1.177482  | 4.76E-05    | 0.005742892 |
| Zmat1         | -0.5349194 | 4.96E-05    | 0.005794545 |
| Phospho1      | 0.5474415  | 6.41E-05    | 0.006985565 |
| Abi3          | 0.50067332 | 6.70E-05    | 0.00708713  |
| Plin5         | 0.8529936  | 6.92E-05    | 0.007098596 |
| Tpgs1         | 0.57752034 | 6.91E-05    | 0.007098596 |
| Apoo          | -0.8171322 | 7.42E-05    | 0.007479892 |
| Orc4          | -0.5435688 | 7.65E-05    | 0.007640957 |
| Mcts1         | -0.5875196 | 9.61E-05    | 0.008725634 |
| Tcf7l1        | 0.52705715 | 9.99E-05    | 0.008996041 |
| Ikzf2         | -0.5776467 | 0.000110782 | 0.009732822 |
| Caprin2       | -0.5993905 | 0.000114053 | 0.009940746 |
| Cyth1         | 0.50781097 | 0.000128062 | 0.011073847 |
| Acadvl        | 0.52192154 | 0.000140674 | 0.011712142 |
| Ech1          | 0.85443999 | 0.000141843 | 0.011712142 |
| Far1          | -0.5460971 | 0.000152342 | 0.012301622 |
| Decr1         | 0.55898726 | 0.000163014 | 0.012787253 |
| Mpp7          | -0.9644691 | 0.000160214 | 0.012787253 |
| Slc38a6       | -0.6830746 | 0.000173367 | 0.013221623 |
| Ndufa3        | 0.61988882 | 0.00017523  | 0.013271591 |
| Hils1         | -0.7967555 | 0.000195865 | 0.014239122 |
| Xk            | -0.7052141 | 0.000196484 | 0.014239122 |
| Sh2d3c        | 0.52617721 | 0.00023038  | 0.015739883 |
| Ramp2         | 0.5221372  | 0.000230752 | 0.015739883 |
| Mrps34        | 0.50721024 | 0.000230345 | 0.015739883 |
| Ppargc1b      | 0.81463104 | 0.0002381   | 0.015811075 |
| Dhrs4         | 0.51954074 | 0.000245478 | 0.015811075 |
| Vwa8          | 0.59763326 | 0.000238045 | 0.015811075 |
| Gpd1          | 0.85859884 | 0.00028784  | 0.017368455 |
| Rac2          | -1.5409597 | 0.000290124 | 0.017410601 |
| Ccdc28a       | -0.5228718 | 0.000300371 | 0.01783069  |
| 4930430F08Rik | -0.7769847 | 0.00030451  | 0.017979192 |
| Vsig10l       | 0.95896513 | 0.000315544 | 0.018142959 |
| Ppargc1a      | 0.67844376 | 0.000353286 | 0.019594863 |

|               |            |             |             |
|---------------|------------|-------------|-------------|
| Zfp703        | 0.51574898 | 0.000359008 | 0.019771723 |
| Zfp800        | -0.5728239 | 0.000374108 | 0.020338861 |
| Sertad1       | 0.74914178 | 0.000381449 | 0.020635803 |
| Rgcc          | 0.7648255  | 0.000403493 | 0.021374797 |
| Cpt1a         | 0.53326974 | 0.000419599 | 0.021736005 |
| Snta1         | 0.65629982 | 0.000424732 | 0.021898648 |
| Cox10         | 0.60375751 | 0.000431477 | 0.022062059 |
| Alg6          | -0.582782  | 0.000448498 | 0.022593582 |
| Olf1033       | -0.7641886 | 0.000457361 | 0.022696207 |
| Igip          | -0.6591159 | 0.000462358 | 0.022769597 |
| Cluh          | 0.52704675 | 0.000479842 | 0.023170905 |
| Zbtb26        | -0.9021721 | 0.000499279 | 0.023518161 |
| 4930429F24Rik | -0.6489488 | 0.000509215 | 0.023796601 |
| Fbp2          | 0.70030708 | 0.000648214 | 0.027960803 |
| Kcnj11        | 0.6098631  | 0.00065335  | 0.028027695 |
| Plin4         | 0.85849093 | 0.000668407 | 0.028341491 |
| Cirbp         | 0.79431693 | 0.000696264 | 0.029184602 |
| Lsp1          | 0.72480968 | 0.000725561 | 0.029955531 |
| Fam57b        | 1.04632401 | 0.000765337 | 0.03090048  |
| Ap1s2         | -0.6951365 | 0.000768795 | 0.030926418 |
| Grcc10        | 0.58217946 | 0.00077478  | 0.031053428 |
| Naglu         | 0.61029736 | 0.000820485 | 0.031952354 |
| Slc25a25      | 0.70176878 | 0.000835969 | 0.032415377 |
| Ptgs1         | 0.60790131 | 0.000846902 | 0.032415377 |
| Dll4          | 0.56091229 | 0.000850085 | 0.032415377 |
| Tspyl2        | 0.5729723  | 0.000889864 | 0.033239733 |
| Hist2h2be     | -0.6181201 | 0.000896374 | 0.033369427 |
| Arhgap27      | 0.54035501 | 0.000904074 | 0.033429429 |
| D17H6S53E     | 0.53212289 | 0.00091418  | 0.033689668 |
| Arsk          | -0.6011857 | 0.000927545 | 0.033729457 |
| Ypel2         | -0.7214137 | 0.000926097 | 0.033729457 |
| Tmem189       | 0.52308612 | 0.000989726 | 0.035520184 |
| Chpf2         | 0.62886377 | 0.001018349 | 0.036192602 |
| Serp1         | -0.547945  | 0.00105219  | 0.036917406 |
| Mylip         | 0.64644007 | 0.001057632 | 0.036990164 |
| Dok7          | 0.64157445 | 0.001119653 | 0.037950717 |
| Tns1          | 0.62033005 | 0.001218852 | 0.039601881 |
| Sorcs2        | 0.68781891 | 0.001242651 | 0.039902889 |
| Tmem71        | -0.6337263 | 0.001268135 | 0.040134449 |
| Zfp874b       | -0.6325278 | 0.001353288 | 0.041629717 |
| Tmem116       | -0.5524448 | 0.001400788 | 0.042731823 |
| Zfp942        | -0.7895844 | 0.001414661 | 0.042755501 |
| Ankrd33b      | 0.58178771 | 0.001409995 | 0.042755501 |

|               |            |             |             |
|---------------|------------|-------------|-------------|
| Klhl2         | 0.63235917 | 0.001414861 | 0.042755501 |
| 4732416N19Rik | -0.6904514 | 0.00150885  | 0.04452246  |
| Ccdc9         | 0.51737541 | 0.001539101 | 0.044973376 |
| Zfp874a       | -0.6446181 | 0.001605052 | 0.046143158 |
| Dzip3         | -0.7230061 | 0.001615355 | 0.046156806 |
| Hdac9         | -0.7319397 | 0.001645749 | 0.046668145 |
| Hadha         | 0.50616437 | 0.001659519 | 0.04673034  |
| Myrip         | 0.70664333 | 0.001731986 | 0.04778503  |
| Impa2         | 0.66298998 | 0.001785134 | 0.047932368 |
| Ap3s1         | -0.6559769 | 0.001783922 | 0.047932368 |
| Tns2          | 0.52718921 | 0.001763421 | 0.047932368 |
| Arhgef19      | 0.5323893  | 0.001852453 | 0.048501981 |
| Rin3          | 0.57500829 | 0.001918328 | 0.0496865   |

**Supplementary Table 3. GO analysis data of TAC mice hearts between SD and LCD-A**

| ID         | Description                                              | pvalue   | p.adjust  | qvalue     | Count | geneID                                                                                                                            |
|------------|----------------------------------------------------------|----------|-----------|------------|-------|-----------------------------------------------------------------------------------------------------------------------------------|
| GO:0006260 | DNA replication                                          | 2.05E-12 | 7.92E-09  | 6.60E-09   | 23    | Mcm3/Prim2/Mcm6/Prim1/Trp53/Cdc6/Wdhd1/Tonsl/Cdc45/Chaf1b/Chtf18/Chaf1a/Pola2/Fen1/Pole/Rfc5/Mcm2/Lig1/Rrm1/Mcm5/Gins2/Cdt1/Pola1 |
| GO:0006261 | DNA-dependent DNA replication                            | 2.66E-11 | 5.13E-08  | 4.28E-08   | 17    | Mcm3/Prim2/Mcm6/Prim1/Cdc6/Wdhd1/Tonsl/Cdc45/Chtf18/Pola2/Pole/Rfc5/Mcm2/Lig1/Mcm5/Cdt1/Pola1                                     |
| GO:0006270 | DNA replication initiation                               | 8.16E-10 | 1.05E-06  | 8.75E-07   | 9     | Mcm3/Mcm6/Cdc6/Cdc45/Pola2/Mcm2/Mcm5/Cdt1/Pola1                                                                                   |
| GO:0000727 | double-strand break repair via break-induced replication | 6.78E-09 | 6.54E-06  | 5.45E-06   | 6     | Mcm3/Mcm6/Cdc45/Mcm2/Mcm5/Gins2                                                                                                   |
| GO:0033260 | nuclear DNA replication                                  | 5.17E-08 | 3.60E-05  | 3.00E-05   | 8     | Mcm3/Mcm6/Cdc45/Mcm2/Lig1/Mcm5/Cdt1/Pola1                                                                                         |
| GO:1902969 | mitotic DNA replication                                  | 5.60E-08 | 3.60E-05  | 3.00E-05   | 6     | Mcm3/Mcm6/Cdc45/Mcm2/Lig1/Pola1                                                                                                   |
| GO:0044786 | cell cycle DNA replication                               | 1.44E-07 | 7.94E-05  | 6.62E-05   | 8     | Mcm3/Mcm6/Cdc45/Mcm2/Lig1/Mcm5/Cdt1/Pola1                                                                                         |
| GO:0071824 | protein-DNA complex subunit organization                 | 4.40E-07 | 0.0002122 | 0.00017695 | 15    | Mcm3/Ptma/Mcm6/Hey2/Tspyl4/Smcarb1/Trp53/Cdc45/Chaf1b/Chaf1a/Itgb3bp/Mcm2/Mcm5/Asf1b/Cdt1                                         |
| GO:0065004 | protein-DNA complex assembly                             | 1.03E-06 | 0.000441  | 0.00036769 | 13    | Mcm3/Mcm6/Hey2/Tspyl4/Trp53/Cdc45/Chaf1b/Chaf1a/Itgb3bp/Mcm2/Mcm5/Asf1b/Cdt1                                                      |
| GO:0009262 | deoxyribonucleotide metabolic process                    | 3.66E-06 | 0.001412  | 0.00117715 | 7     | Xdh/Dpyd/Tyms/Nudt1/Nt5c3/Rrm1/Dctd                                                                                               |

|            |                                                  |          |           |            |    |                                                                                                                           |
|------------|--------------------------------------------------|----------|-----------|------------|----|---------------------------------------------------------------------------------------------------------------------------|
| GO:1903131 | mononuclear cell differentiation                 | 4.07E-06 | 0.0014273 | 0.00118997 | 21 | Cd46/Prdm1/Trp53/Lgals9/Gadd45g/Prelid1/Ctsl/F2r1/Pik3r1/Ripk3/Egr3/Lgals1/Egr1/Nrarp/Dll4/Csf1/Shb/Dtx1/Cyp26b1/Relb/Bax |
| GO:0030217 | T cell differentiation                           | 4.55E-06 | 0.0014614 | 0.00121838 | 16 | Cd46/Prdm1/Trp53/Lgals9/Gadd45g/Prelid1/Ctsl/Ripk3/Egr3/Egr1/Nrarp/Dll4/Shb/Dtx1/Cyp26b1/Relb                             |
| GO:0046073 | dTMP metabolic process                           | 7.87E-06 | 0.0023349 | 0.00194659 | 4  | Dpyd/Tyms/Nt5c3/Dctd                                                                                                      |
| GO:0050678 | regulation of epithelial cell proliferation      | 8.67E-06 | 0.0023878 | 0.00199066 | 18 | Pbld1/Nme1/Etv4/Bmp6/Ctsl/Egr3/Sema5a/Uhrf1/Xdh/Nrarp/Egfl7/Thbs1/Dll4/Dysf/Ift122/Bax/Ccnd1/Apln                         |
| GO:0044772 | mitotic cell cycle phase transition              | 1.07E-05 | 0.0026655 | 0.00222226 | 18 | Trp53/Cdc6/Plk2/Fam107a/Mtbp/Tcf19/Plk3/Rcc1/Abcb1a/Ccng2/Pole/Pidd1/Ccnd1/Rbl2/Nae1/Cdt1/Fbxl22/Cul4b                    |
| GO:0030098 | lymphocyte differentiation                       | 1.16E-05 | 0.0026655 | 0.00222226 | 19 | Cd46/Prdm1/Trp53/Lgals9/Gadd45g/Prelid1/Ctsl/Pik3r1/Ripk3/Egr3/Lgals1/Egr1/Nrarp/Dll4/Shb/Dtx1/Cyp26b1/Relb/Bax           |
| GO:0007093 | mitotic cell cycle checkpoint                    | 1.23E-05 | 0.0026655 | 0.00222226 | 10 | Trp53/Cdc6/Plk2/Mtbp/Bcl2l1/Plk3/Pidd1/Ccnd1/Nae1/Cdt1                                                                    |
| GO:0072527 | pyrimidine-containing compound metabolic process | 1.24E-05 | 0.0026655 | 0.00222226 | 7  | Nme1/Tk1/Aldh6a1/Dpyd/Tyms/Nt5c3/Dctd                                                                                     |
| GO:0000082 | G1/S transition of mitotic cell cycle            | 1.37E-05 | 0.0027868 | 0.00232332 | 12 | Trp53/Plk2/Fam107a/Mtbp/Tcf19/Plk3/Rcc1/Pole/Pidd1/Ccnd1/Rbl2/Cul4b                                                       |
| GO:0150105 | NA                                               | 1.92E-05 | 0.0036964 | 0.00308166 | 5  | Actg1/Abcb1a/Actb/Actn4/Flna                                                                                              |
| GO:0050673 | epithelial cell proliferation                    | 2.20E-05 | 0.0039089 | 0.00325886 | 19 | Pbld1/Nme1/Etv4/Bmp6/Ctsl/Egr3/Sema5a/Tcf19/Uhrf1/Xdh/Nrarp/Egfl7/Thbs1/Dll4/Dysf/Ift122/Bax/Ccnd1/Apln                   |



|            |                                                                |          |           |            |    |                                                                                                                    |
|------------|----------------------------------------------------------------|----------|-----------|------------|----|--------------------------------------------------------------------------------------------------------------------|
| GO:0009394 | 2'-deoxyribonucleotide metabolic process                       | 2.33E-05 | 0.0039089 | 0.00325886 | 6  | Xdh/Dpyd/Tyms/Nudt1/Nt5c3/Dctd                                                                                     |
| GO:0019692 | deoxyribose phosphate metabolic process                        | 2.33E-05 | 0.0039089 | 0.00325886 | 6  | Xdh/Dpyd/Tyms/Nudt1/Nt5c3/Dctd                                                                                     |
| GO:0006281 | DNA repair                                                     | 2.64E-05 | 0.004226  | 0.00352317 | 20 | Mcm3/Mcm6/Trp53/Wdhd1/Tonsl/Cdc45/Chaf1b/Chaf1a/Uhrf1/Fen1/Pole/Rfc5/Zcwpw1/Nudt1/Mcm2/Lig1/Mcm5/Gins2/Cul4b/Pola1 |
| GO:0001936 | regulation of endothelial cell proliferation                   | 2.74E-05 | 0.004226  | 0.00352317 | 10 | Bmp6/Egr3/Sema5a/Xdh/Nrarp/Egfl7/Thbs1/Dll4/Dysf/Apln                                                              |
| GO:0009162 | deoxyribonucleoside monophosphate metabolic process            | 2.90E-05 | 0.004299  | 0.00358403 | 5  | Xdh/Dpyd/Tyms/Nt5c3/Dctd                                                                                           |
| GO:0006970 | response to osmotic stress                                     | 3.10E-05 | 0.0044342 | 0.00369681 | 8  | Map7/Trp53/Plk3/Abcb1a/Dysf/Relb/Bax/Tsc22d3                                                                       |
| GO:0006271 | DNA strand elongation involved in DNA replication              | 3.59E-05 | 0.004838  | 0.00403339 | 4  | Mcm3/Pole/Lig1/Pola1                                                                                               |
| GO:0044843 | cell cycle G1/S phase transition                               | 3.64E-05 | 0.004838  | 0.00403339 | 12 | Trp53/Plk2/Fam107a/Mtbp/Tcf19/Plk3/Rcc1/Pole/Pidd1/Ccnd1/Rbl2/Cul4b                                                |
| GO:0044770 | cell cycle phase transition                                    | 4.12E-05 | 0.0053012 | 0.00441957 | 18 | Trp53/Cdc6/Plk2/Fam107a/Mtbp/Tcf19/Plk3/Rcc1/Abcb1a/Ccng2/Pole/Pidd1/Ccnd1/Rbl2/Nae1/Cdt1/Fbxl22/Cul4b             |
| GO:0009176 | pyrimidine deoxyribonucleoside monophosphate metabolic process | 4.84E-05 | 0.005828  | 0.0048588  | 4  | Dpyd/Tyms/Nt5c3/Dctd                                                                                               |
| GO:0010917 | negative regulation of mitochondrial membrane potential        | 4.84E-05 | 0.005828  | 0.0048588  | 4  | Preli1/Slc25a27/Bax/Bnip3                                                                                          |
| GO:0001935 | endothelial cell proliferation                                 | 6.64E-05 | 0.0077627 | 0.00647177 | 10 | Bmp6/Egr3/Sema5a/Xdh/Nrarp/Egfl7/Thbs1/Dll4/Dysf/Apln                                                              |

|            |                                      |          |           |            |    |                                                                                        |
|------------|--------------------------------------|----------|-----------|------------|----|----------------------------------------------------------------------------------------|
| GO:0007162 | negative regulation of cell adhesion | 8.58E-05 | 0.0097332 | 0.00811452 | 14 | Lgals9/Bmp6/Pik3r1/Fam107a/Sema5a/Lgals1/Abat/Spry4/Cfl1/Nrarp/Thbs1/Dtx1/Plxnd1/Actn4 |
|------------|--------------------------------------|----------|-----------|------------|----|----------------------------------------------------------------------------------------|

**Supplementary Table 4. GO analysis data of TAC mice hearts between SD and LCD-P**

| ID         | Description                                 | pvalue   | p.adjust  | qvalue     | Count | geneID                                                                          |
|------------|---------------------------------------------|----------|-----------|------------|-------|---------------------------------------------------------------------------------|
| GO:0006635 | fatty acid beta-oxidation                   | 5.06E-09 | 7.13E-06  | 6.41E-06   | 8     | Dbi/Acadvl/Akt1/Plin5/Acaa2/Cpt1a/Decr1/Hadha                                   |
| GO:0019395 | fatty acid oxidation                        | 6.82E-09 | 7.13E-06  | 6.41E-06   | 9     | Dbi/Acadvl/Akt1/Plin5/Acaa2/Cpt1a/Decr1/Hadha/Ppargc1a                          |
| GO:0034440 | lipid oxidation                             | 1.18E-08 | 8.24E-06  | 7.41E-06   | 9     | Dbi/Acadvl/Akt1/Plin5/Acaa2/Cpt1a/Decr1/Hadha/Ppargc1a                          |
| GO:0009062 | fatty acid catabolic process                | 4.89E-08 | 2.56E-05  | 2.30E-05   | 8     | Dbi/Acadvl/Akt1/Plin5/Acaa2/Cpt1a/Decr1/Hadha                                   |
| GO:0046320 | regulation of fatty acid oxidation          | 6.57E-08 | 2.75E-05  | 2.47E-05   | 6     | Dbi/Acadvl/Akt1/Plin5/Cpt1a/Ppargc1a                                            |
| GO:0030258 | lipid modification                          | 1.12E-07 | 3.89E-05  | 3.50E-05   | 11    | Dbi/Acadvl/Akt1/Ip6k3/Plin5/Impa2/Acaa2/Cpt1a/Decr1/Hadha/Ppargc1a              |
| GO:0072329 | monocarboxylic acid catabolic process       | 2.11E-07 | 6.32E-05  | 5.68E-05   | 8     | Dbi/Acadvl/Akt1/Plin5/Acaa2/Cpt1a/Decr1/Hadha                                   |
| GO:0006631 | fatty acid metabolic process                | 3.10E-07 | 8.10E-05  | 7.28E-05   | 13    | Dbi/Acadvl/Akt1/Plin5/Acaa2/Cpt1a/Ptgs1/Tmem189/Decr1/Hadha/Ppargc1a/Tecr1/Ech1 |
| GO:0046322 | negative regulation of fatty acid oxidation | 9.87E-07 | 0.0002128 | 0.00019129 | 4     | Dbi/Acadvl/Akt1/Plin5                                                           |
| GO:0044282 | small molecule catabolic process            | 1.02E-06 | 0.0002128 | 0.00019129 | 11    | Dbi/Hk1/Acadvl/Akt1/Abat/Plin5/Impa2/Acaa2/Cpt1a/Decr1/Hadha                    |
| GO:0046395 | carboxylic acid catabolic process           | 1.42E-06 | 0.0002701 | 0.00024282 | 9     | Dbi/Acadvl/Akt1/Abat/Plin5/Acaa2/Cpt1a/Decr1/Hadha                              |
| GO:0016054 | organic acid catabolic process              | 1.96E-06 | 0.0003407 | 0.00030632 | 9     | Dbi/Acadvl/Akt1/Abat/Plin5/Acaa2/Cpt1a/Decr1/Hadha                              |

|            |                                                         |          |           |            |    |                                                                          |
|------------|---------------------------------------------------------|----------|-----------|------------|----|--------------------------------------------------------------------------|
| GO:0044242 | cellular lipid catabolic process                        | 2.56E-06 | 0.0004113 | 0.00036978 | 9  | Dbi/Acadvl/Akt1/Plin5/Acaa2/Cpt1a/Decr1/Hadha/Smpd1                      |
| GO:0031998 | regulation of fatty acid beta-oxidation                 | 5.14E-06 | 0.000768  | 0.00069046 | 4  | Dbi/Akt1/Plin5/Cpt1a                                                     |
| GO:0019217 | regulation of fatty acid metabolic process              | 1.32E-05 | 0.0017264 | 0.00155216 | 6  | Dbi/Acadvl/Akt1/Plin5/Cpt1a/Ppargc1a                                     |
| GO:0062014 | negative regulation of small molecule metabolic process | 1.32E-05 | 0.0017264 | 0.00155216 | 6  | Dbi/Acadvl/Akt1/Pgp/Plin5/Ppargc1a                                       |
| GO:0045922 | negative regulation of fatty acid metabolic process     | 1.40E-05 | 0.0017271 | 0.00155284 | 4  | Dbi/Acadvl/Akt1/Plin5                                                    |
| GO:0006006 | glucose metabolic process                               | 1.81E-05 | 0.0019867 | 0.00178622 | 8  | Hk1/Akt1/Fbp2/Gpd1/Pgp/Cpt1a/Serp1/Kcnj11                                |
| GO:0042180 | cellular ketone metabolic process                       | 1.81E-05 | 0.0019867 | 0.00178622 | 8  | Dbi/Acadvl/Akt1/Dhrs4/Gpd1/Plin5/Cpt1a/Ppargc1a                          |
| GO:0046486 | glycerolipid metabolic process                          | 2.97E-05 | 0.0031065 | 0.00279306 | 10 | Pgap1/Dbi/Gpd1/Pgp/Ip6k3/Plin5/Impa2/Cpt1a/Hadha/Far1                    |
| GO:0019318 | hexose metabolic process                                | 4.50E-05 | 0.0044844 | 0.00403186 | 8  | Hk1/Akt1/Fbp2/Gpd1/Pgp/Cpt1a/Serp1/Kcnj11                                |
| GO:0007005 | mitochondrion organization                              | 6.11E-05 | 0.0058072 | 0.00522122 | 11 | Pnpt1/Cox10/Cluh/Akt1/Cxadr/Acaa2/Ppargc1a/Ndufa3/Tmem126a/Slc25a36/Apoo |
| GO:0016042 | lipid catabolic process                                 | 6.88E-05 | 0.0062557 | 0.00562447 | 9  | Dbi/Acadvl/Akt1/Plin5/Acaa2/Cpt1a/Decr1/Hadha/Smpd1                      |
| GO:0005996 | monosaccharide metabolic process                        | 7.27E-05 | 0.0063303 | 0.00569156 | 8  | Hk1/Akt1/Fbp2/Gpd1/Pgp/Cpt1a/Serp1/Kcnj11                                |
| GO:0010565 | regulation of cellular ketone metabolic process         | 9.62E-05 | 0.0080496 | 0.00723736 | 6  | Dbi/Acadvl/Akt1/Plin5/Cpt1a/Ppargc1a                                     |
| GO:0062012 | regulation of small molecule metabolic process          | 0.000112 | 0.0090371 | 0.00812519 | 9  | Dbi/Acadvl/Akt1/Gpd1/Pgp/Plin5/Cpt1a/Ppargc1a/Pth1r                      |

**Supplementary Table 5. IPA data of TAC mice hearts between SD and LCD-P**

| Upstream Regulator           | Molecule Type                     | p-value of overlap | Target molecules in dataset                                             |
|------------------------------|-----------------------------------|--------------------|-------------------------------------------------------------------------|
| GW501516                     | chemical drug                     | 2.23E-06           | ACAA2,CPT1A,DECR1,ECH1,GPD1,HADHA,PPARGC1A                              |
| PNPLA2                       | enzyme                            | 3.03E-06           | ACAA2,ACADVL,CPT1A,PPARGC1A,PPARGC1B                                    |
| MAP4K4                       | kinase                            | 5.90E-06           | ACAA2,ACADVL,COX10,DHRS4,FAR1,HADHA,NDUFA3                              |
| pirinixic acid               | chemical toxicant                 | 1.05E-05           | ACAA2,ACADVL,CPT1A,DBI,DECR1,ECH1,FBP2,GPD1,HADHA,PLIN4,PLIN5,PPARGC1A  |
| PLIN5                        | other                             | 2.01E-05           | ACAA2,ACADVL,PPARGC1A,PPARGC1B                                          |
| gemfibrozil                  | chemical drug                     | 5.90E-05           | ACADVL,CPT1A,DECR1,ECH1,HADHA                                           |
| PPARA                        | ligand-dependent nuclear receptor | 7.26E-05           | ACAA2,ACADVL,CPT1A,DBI,DECR1,ECH1,GPD1,HADHA,PLIN4,PLIN5,PPARGC1A       |
| OMA1                         | peptidase                         | 1.02E-04           | ACADVL,PPARGC1A,PPARGC1B                                                |
| PPARG                        | ligand-dependent nuclear receptor | 1.04E-04           | ACAA2,CPT1A,FAM57B,FBP2,GPD1,HADHA,PLIN4,PLIN5,PPARGC1A,PPARGC1B,ZNF703 |
| KLF15                        | transcription regulator           | 1.24E-04           | ACADVL,DECR1,HADHA,PPARGC1A                                             |
| fenofibrate                  | chemical drug                     | 1.40E-04           | ACAA2,ACADVL,CPT1A,DBI,DECR1,ECH1,FBP2,HADHA                            |
| FGF21                        | growth factor                     | 1.48E-04           | CPT1A,MYLIP,PPARGC1A,PPARGC1B                                           |
| bezafibrate                  | chemical drug                     | 2.47E-04           | ACADVL,DBI,ECH1,HADHA,PPARGC1A                                          |
| DMD                          | other                             | 2.54E-04           | GPD1,IMPA2,IP6K3,LAMP2,PPARGC1A,SNTA1,XK                                |
| clofibrate                   | chemical drug                     | 2.85E-04           | ACADVL,CPT1A,DECR1,ECH1,HADHA                                           |
| mono-(2-ethylhexyl)phthalate | chemical toxicant                 | 4.01E-04           | ACADVL,FBP2,GPD1,HADHA,PPARGC1A,PPARGC1B                                |
| vaccenic acid                | chemical - endogenous mammalian   | 4.96E-04           | PLIN4,PLIN5                                                             |
| DIO3                         | enzyme                            | 7.68E-04           | CIRBP,KCNJ11,SEMA7A                                                     |
| GCG                          | other                             | 8.28E-04           | CPT1A,HK1,PPARGC1A,PPARGC1B                                             |

|                                                       |                                     |          |                                                            |
|-------------------------------------------------------|-------------------------------------|----------|------------------------------------------------------------|
| rosiglitazone                                         | chemical drug                       | 8.81E-04 | ACAA2,ACADVL,CPT1A,DECR1,ECH1,GPD1,PLIN5,PPARGC1A,PPARGC1B |
| 2,4-dinitrophenol                                     | chemical toxicant                   | 9.19E-04 | PPARGC1A,PPARGC1B                                          |
| meldonium                                             | chemical drug                       | 9.19E-04 | CPT1A,HADHA                                                |
| AP3B1                                                 | transporter                         | 1.18E-03 | AP3S1,LAMP2                                                |
| D-thioctic acid                                       | chemical - endogenous mammalian     | 1.18E-03 | CPT1A,PPARGC1A                                             |
| KCNJ11                                                | ion channel                         | 1.18E-03 | ACADVL,PPARGC1A                                            |
| methapyrilene                                         | chemical drug                       | 1.33E-03 | ABAT,CPT1A,DBI,DECR1,SERP1                                 |
| PPARD                                                 | ligand-dependent nuclear receptor   | 1.72E-03 | ACAA2,ACADVL,CPT1A,ECH1,GPD1,PPARGC1B                      |
| CPT1C                                                 | enzyme                              | 1.79E-03 | CPT1A,PPARGC1A                                             |
| eicosapentenoic acid                                  | chemical drug                       | 1.98E-03 | ACADVL,ECH1,IMPA2,KCNJ11                                   |
| PIK3CB                                                | kinase                              | 2.13E-03 | DLL4,HK1                                                   |
| INS                                                   | other                               | 2.15E-03 | ACADVL,CPT1A,PPARGC1A,PTGS1,SMPD1                          |
| gamma-linolenic acid                                  | chemical - endogenous mammalian     | 2.51E-03 | PLIN4,PLIN5                                                |
| HSPA5                                                 | enzyme                              | 2.92E-03 | ACADVL,CPT1A,HADHA                                         |
| guanidinopropionic acid                               | chemical - endogenous non-mammalian | 2.92E-03 | NDUFA3,PPARGC1A,PPARGC1B                                   |
| carbonyl cyanide p-(trifluoromethoxy)phenyl hydrazone | chemical reagent                    | 2.92E-03 | PPARGC1A,PPARGC1B                                          |
| methotrexate                                          | chemical drug                       | 3.02E-03 | ACAA2,ACADVL,CPT1A,ECH1,FAR1,HADHA                         |
| fluocinolone acetonide                                | chemical drug                       | 3.09E-03 | CXADR,LSP1,RGCC                                            |
| ENPP2                                                 | enzyme                              | 3.36E-03 | PPARGC1A,PPARGC1B                                          |

|                               |                                     |          |                                                         |
|-------------------------------|-------------------------------------|----------|---------------------------------------------------------|
| PLIN1                         | other                               | 3.36E-03 | ACADVL,HADHA                                            |
| SERTAD2                       | transcription regulator             | 3.36E-03 | ECH1,PPARGC1A                                           |
| plicamycin                    | chemical drug                       | 3.56E-03 | EPS8,GPD1,SEMA7A,TESC                                   |
| fatty acid                    | chemical - endogenous mammalian     | 3.68E-03 | AKT1,PLIN4,PLIN5,PPARGC1A                               |
| IL15                          | cytokine                            | 3.87E-03 | AKT1,CPT1A,DHRS4,HK1,LSP1,PPARGC1A,PPARGC1B,RAC2        |
| FOXO1                         | transcription regulator             | 3.93E-03 | COX10,GPD1,IKZF2,LAMP2,PPARGC1A,PPARGC1B,PTGS1,SLC25A25 |
| ESRRA                         | ligand-dependent nuclear receptor   | 4.28E-03 | ACADVL,HADHA,HK1,PPARGC1A,PPARGC1B                      |
| ABCC8                         | transporter                         | 4.31E-03 | ACADVL,PPARGC1A                                         |
| NO 1886                       | chemical drug                       | 4.31E-03 | ACAA2,HADHA                                             |
| LEP                           | growth factor                       | 4.68E-03 | ACADVL,CPT1A,DLL4,ECH1,FBP2,PPARGC1A,PPARGC1B,SMPD1     |
| SCD                           | enzyme                              | 4.70E-03 | ACADVL,CPT1A,PPARGC1A                                   |
| PKD1                          | ion channel                         | 4.79E-03 | ALG6,APOO,HDAC9,KLHL28,TNS1                             |
| MED30                         | transcription regulator             | 5.38E-03 | COX10,PPARGC1A                                          |
| acetyl-L-carnitine            | chemical - endogenous mammalian     | 5.38E-03 | CPT1A,PPARGC1A                                          |
| MEF2C                         | transcription regulator             | 5.50E-03 | HDAC9,PPARGC1A,PTH1R,SCN5A                              |
| NR4A3                         | ligand-dependent nuclear receptor   | 5.67E-03 | FBP2,PPARGC1A,PPARGC1B                                  |
| 3-aminoisobutanoate           | chemical - endogenous mammalian     | 5.82E-03 | CPT1A                                                   |
| AMG-9810                      | chemical reagent                    | 5.82E-03 | PPARGC1A                                                |
| E. coli 0111:B4 peptidoglycan | chemical - endogenous non-mammalian | 5.82E-03 | DBI                                                     |

|                          |                                     |          |                                                    |
|--------------------------|-------------------------------------|----------|----------------------------------------------------|
| GW 6471                  | chemical reagent                    | 5.82E-03 | PPARGC1A                                           |
| OSTN                     | other                               | 5.82E-03 | PPARGC1A                                           |
| SCN10A                   | ion channel                         | 5.82E-03 | SCN5A                                              |
| Tug1                     | other                               | 5.82E-03 | PPARGC1A                                           |
| nicotinamide-beta-ribose | chemical - endogenous mammalian     | 5.82E-03 | PPARGC1A                                           |
| stearidonic acid         | chemical - endogenous mammalian     | 5.82E-03 | PTGS1                                              |
| TFAM                     | transcription regulator             | 5.96E-03 | ECH1,HK1                                           |
| BSCL2                    | other                               | 6.46E-03 | GPD1,PPARGC1B,PTGS1                                |
| PD 169316                | chemical - kinase inhibitor         | 6.56E-03 | PPARGC1A,PPARGC1B                                  |
| HIPK2                    | kinase                              | 7.03E-03 | PPARGC1A,RAC2,ZFPM1                                |
| zymosan                  | chemical - endogenous non-mammalian | 7.32E-03 | PPARGC1A,PPARGC1B,PTGS1                            |
| RB1                      | transcription regulator             | 7.79E-03 | AKT1,EPS8,HIST1H2BJ,NDUFA3,PPARGC1A,PPARGC1B,PTGS1 |
| mir-33                   | microRNA                            | 7.85E-03 | CPT1A,PPARGC1A                                     |
| zidovudine               | chemical drug                       | 7.85E-03 | AKT1,CPT1A                                         |
| triamcinolone acetonide  | chemical drug                       | 7.90E-03 | AP3S1,CXADR,LSP1,RGCC,TSPYL2                       |
| VEGFA                    | growth factor                       | 7.91E-03 | AKT1,DECR1,DLL4,HK1,PPARGC1A,PTGS1                 |
| PRNP                     | other                               | 7.93E-03 | EPS8,LAMP2,TCF7L1                                  |
| linoleic acid            | chemical - endogenous mammalian     | 8.25E-03 | CPT1A,PLIN4,PLIN5                                  |
| mir-17                   | microRNA                            | 8.25E-03 | AKT1,CAPRIN2,MYLIP                                 |
| INSR                     | kinase                              | 8.44E-03 | ACAA2,ACADVL,DECR1,HADHA,NDUFA3,PPARGC1A,PPARGC1B  |



|                                |                                 |          |                                                                                                               |
|--------------------------------|---------------------------------|----------|---------------------------------------------------------------------------------------------------------------|
| GW7647                         | chemical drug                   | 8.53E-03 | CPT1A,PPARGC1A                                                                                                |
| Calcineurin A                  | group                           | 9.23E-03 | AKT1,PPARGC1A                                                                                                 |
| HAND1                          | transcription regulator         | 9.23E-03 | CPT1A,DBI                                                                                                     |
| TP53                           | transcription regulator         | 9.25E-03 | ABAT,ACAA2,ACADVL,AKT1,CLUH,COX10,CPT1A,DBI,ECH1,EPS8,GPD1,HADHA,HDAC9,LSP1,PPARGC1A,PPARGC1B,PTGS1,RAC2,XPO1 |
| tretinoin                      | chemical - endogenous mammalian | 9.33E-03 | AKT1,AP1S2,C12orf29,CPT1A,DBI,DLL4,GRASP,HADHA,HK1,LAMP2,LSP1,PPARGC1A,PTGS1,SEMA7A,SLC25A36,SMPD1,XK         |
| TGM2                           | enzyme                          | 1.04E-02 | C12orf29,LSP1,PTGS1,SEMA7A,SMPD1                                                                              |
| LPIN1                          | phosphatase                     | 1.07E-02 | ACADVL,CPT1A                                                                                                  |
| PPP3CA                         | phosphatase                     | 1.10E-02 | CPT1A,DECR1,LAMP2                                                                                             |
| MTOR                           | kinase                          | 1.15E-02 | HADHA,PGP,PPARGC1A,PPARGC1B,PTH1R,SMPD1                                                                       |
| CIDEC                          | other                           | 1.15E-02 | PPARGC1A,PPARGC1B                                                                                             |
| MEF2                           | group                           | 1.15E-02 | DLL4,PPARGC1A                                                                                                 |
| stearic acid                   | chemical - endogenous mammalian | 1.15E-02 | PPARGC1A,PPARGC1B                                                                                             |
| KCP                            | other                           | 1.16E-02 | PPARGC1A                                                                                                      |
| MLIP                           | other                           | 1.16E-02 | HK1                                                                                                           |
| Mitochondrial complex 1        | complex                         | 1.16E-02 | PPARGC1A                                                                                                      |
| RPS6KA1                        | kinase                          | 1.16E-02 | SEMA7A                                                                                                        |
| SLC20A1                        | transporter                     | 1.16E-02 | AKT1                                                                                                          |
| SLC25A33                       | transporter                     | 1.16E-02 | PPARGC1A                                                                                                      |
| canertinib                     | chemical drug                   | 1.16E-02 | AKT1                                                                                                          |
| cyclic des-acyl ghrelin (6-13) | biologic drug                   | 1.16E-02 | PPARGC1A                                                                                                      |

|                                |                                 |          |                                      |
|--------------------------------|---------------------------------|----------|--------------------------------------|
| foscarnet                      | chemical drug                   | 1.16E-02 | AKT1                                 |
| mir-374                        | microrna                        | 1.16E-02 | AKT1                                 |
| prostaglandin E3               | chemical - endogenous mammalian | 1.16E-02 | PTGS1                                |
| ELOVL5                         | enzyme                          | 1.23E-02 | HADHA,PPARGC1A                       |
| MLXIPL                         | transcription regulator         | 1.31E-02 | CPT1A,GPD1                           |
| PRKCI                          | kinase                          | 1.31E-02 | HK1,KCNJ11                           |
| PPARGC1A                       | transcription regulator         | 1.49E-02 | ACADVL,CPT1A,PLIN5,PPARGC1A,PPARGC1B |
| DIO2                           | enzyme                          | 1.58E-02 | CIRBP,SEMA7A                         |
| HSD11B1                        | enzyme                          | 1.58E-02 | CPT1A,PPARGC1A                       |
| RAB1B                          | other                           | 1.58E-02 | CYTH1,SERP1                          |
| SLC16A2                        | transporter                     | 1.58E-02 | CIRBP,SEMA7A                         |
| Ank2                           | other                           | 1.74E-02 | KCNJ11                               |
| DGCR5                          | other                           | 1.74E-02 | AKT1                                 |
| DUB                            | group                           | 1.74E-02 | MYLIP                                |
| HAO1                           | enzyme                          | 1.74E-02 | PPARGC1A                             |
| HCFC1                          | transcription regulator         | 1.74E-02 | PPARGC1B                             |
| SLC30A7                        | transporter                     | 1.74E-02 | AKT1                                 |
| SLN                            | other                           | 1.74E-02 | PPARGC1A                             |
| Trk Receptor                   | group                           | 1.74E-02 | AKT1                                 |
| Z-LEHD-FMK                     | chemical reagent                | 1.74E-02 | AKT1                                 |
| mecamylamine                   | chemical drug                   | 1.74E-02 | KCNJ11                               |
| mir-1180                       | microrna                        | 1.74E-02 | AKT1                                 |
| mir-149                        | microrna                        | 1.74E-02 | AKT1                                 |
| natriuretic peptide derivative | biologic drug                   | 1.74E-02 | PPARGC1A                             |

|                                                                                              |                            |          |                                       |
|----------------------------------------------------------------------------------------------|----------------------------|----------|---------------------------------------|
| stavudine                                                                                    | chemical drug              | 1.74E-02 | CPT1A                                 |
| nafenopin                                                                                    | chemical drug              | 1.96E-02 | CPT1A,DECR1                           |
| FOXA3                                                                                        | transcription regulator    | 2.06E-02 | CPT1A,PPARGC1A                        |
| tetraethylammonium                                                                           | chemical drug              | 2.27E-02 | ECH1,HADHA                            |
| 2-[3-chloro-4-[3-[(3-phenyl-7-propyl-1-benzofuran-6-yl)oxy]propylsulfanyl]phenyl]acetic acid | chemical reagent           | 2.31E-02 | CPT1A                                 |
| ABCC9                                                                                        | ion channel                | 2.31E-02 | PPARGC1A                              |
| ACOT11                                                                                       | enzyme                     | 2.31E-02 | PPARGC1A                              |
| HCAR1                                                                                        | g-protein coupled receptor | 2.31E-02 | PPARGC1A                              |
| SCIN                                                                                         | other                      | 2.31E-02 | RAC2                                  |
| miR-515-5p (and other miRNAs w/seed UCUCCAA)                                                 | mature microRNA            | 2.31E-02 | TCF7L1                                |
| nebivolol                                                                                    | chemical drug              | 2.31E-02 | PTGS1                                 |
| pterosin B                                                                                   | chemical reagent           | 2.31E-02 | PPARGC1A                              |
| trimetazidine                                                                                | chemical drug              | 2.31E-02 | PPARGC1A                              |
| troglitazone                                                                                 | chemical drug              | 2.33E-02 | ARHGEF19,DBI,ECH1,GPD1,PLIN4,PPARGC1A |
| CTGF                                                                                         | growth factor              | 2.35E-02 | AKT1,PTH1R,RAMP2                      |
| PRKAA                                                                                        | group                      | 2.38E-02 | CPT1A,PPARGC1A                        |
| NOS2                                                                                         | enzyme                     | 2.43E-02 | GPD1,PPARGC1A,PTGS1,TSPYL2            |
| nicotine                                                                                     | chemical drug              | 2.43E-02 | AKT1,DBI,KCNJ11,PTH1R                 |
| Esrra                                                                                        | transcription regulator    | 2.46E-02 | CPT1A,ECH1,PPARGC1A                   |

|                                |                                        |          |                                                                                                                |
|--------------------------------|----------------------------------------|----------|----------------------------------------------------------------------------------------------------------------|
| 8-epi-prostaglandin<br>F2alpha | chemical - endogenous<br>mammalian     | 2.88E-02 | PTH1R                                                                                                          |
| ACOT13                         | enzyme                                 | 2.88E-02 | PPARGC1A                                                                                                       |
| FOXN4                          | transcription regulator                | 2.88E-02 | DLL4                                                                                                           |
| LAMP1                          | other                                  | 2.88E-02 | LAMP2                                                                                                          |
| MYBBP1A                        | transcription regulator                | 2.88E-02 | PPARGC1A                                                                                                       |
| Nfatc                          | group                                  | 2.88E-02 | PPARGC1A                                                                                                       |
| SLC22A2                        | transporter                            | 2.88E-02 | CPT1A                                                                                                          |
| SOX18                          | transcription regulator                | 2.88E-02 | DLL4                                                                                                           |
| ZFA-fmk                        | chemical toxicant                      | 2.88E-02 | LAMP2                                                                                                          |
| aurapten                       | chemical - endogenous<br>non-mammalian | 2.88E-02 | CPT1A                                                                                                          |
| globotriaosylceramide          | chemical - endogenous<br>mammalian     | 2.88E-02 | LAMP2                                                                                                          |
| mir-637                        | microrna                               | 2.88E-02 | AKT1                                                                                                           |
| oleic acid                     | chemical - endogenous<br>mammalian     | 2.90E-02 | PLIN4,PLIN5,PPARGC1A                                                                                           |
| cisplatin                      | chemical drug                          | 2.92E-02 | ACADVL,AKT1,CPT1A,HADHA,HDAC9,HK1,PPARGC1A,SLC25A36,SMPD1                                                      |
| TGFB1                          | growth factor                          | 2.98E-02 | ACAA2,AKT1,AP3S1,ARHGEF19,CCDC28A,CXADR,DZIP3,HDAC9,PPARGC1A,PTGS1,PTH1R,RAMP2,RGCC,SEMA7A,SERP1,SERTAD1,TPST2 |
| GLI1                           | transcription regulator                | 3.10E-02 | ACADVL,AKT1,IMPA2,PTH1R                                                                                        |
| NR1H3                          | ligand-dependent nuclear<br>receptor   | 3.23E-02 | HK1,MYLIP,PPARGC1A                                                                                             |
| ERBB2                          | kinase                                 | 3.24E-02 | ACAA2,AKT1,DECR1,DZIP3,KIFC3,LAMP2,PTGS1,SERP1,ZNF703                                                          |

|              |                                     |          |                                           |
|--------------|-------------------------------------|----------|-------------------------------------------|
| D-glucose    | chemical - endogenous mammalian     | 3.36E-02 | ACAA2,DBI,DECR1,FBP2,GPD1,HK1,PPARGC1A,XK |
| EPB41        | other                               | 3.44E-02 | SCN5A                                     |
| ERF          | transcription regulator             | 3.44E-02 | SEMA7A                                    |
| HMG20A       | transcription regulator             | 3.44E-02 | CXADR                                     |
| KRIT1        | other                               | 3.44E-02 | DLL4                                      |
| KX-01        | chemical drug                       | 3.44E-02 | AKT1                                      |
| OBP2B        | transporter                         | 3.44E-02 | CPT1A                                     |
| PDZK1IP1     | other                               | 3.44E-02 | PTGS1                                     |
| PITPNA       | transporter                         | 3.44E-02 | PTGS1                                     |
| SPTBN4       | other                               | 3.44E-02 | KCNJ11                                    |
| XPA          | other                               | 3.44E-02 | PTGS1                                     |
| tasoglutide  | biologic drug                       | 3.44E-02 | CPT1A                                     |
| CEBPB        | transcription regulator             | 3.56E-02 | CIRBP,CPT1A,PPARGC1A,PTGS1,RAC2,SERP1     |
| BMP7         | growth factor                       | 3.59E-02 | AKT1,PPARGC1A,PPARGC1B                    |
| FST          | other                               | 3.69E-02 | PPARGC1A,PPARGC1B                         |
| MSTN         | growth factor                       | 3.69E-02 | AKT1,PPARGC1A                             |
| ZBTB20       | transcription regulator             | 3.69E-02 | AKT1,PPARGC1A                             |
| HDAC4        | transcription regulator             | 3.74E-02 | DLL4,HDAC9,KLHL2                          |
| FNIP1        | other                               | 4.00E-02 | PPARGC1A                                  |
| ITGB1BP1     | transporter                         | 4.00E-02 | DLL4                                      |
| MARCKSL1     | other                               | 4.00E-02 | SCN5A                                     |
| PQQ cofactor | chemical - endogenous non-mammalian | 4.00E-02 | PPARGC1A                                  |
| RIOX1        | enzyme                              | 4.00E-02 | AKT1                                      |
| SLC22A1      | transporter                         | 4.00E-02 | CPT1A                                     |

|                                              |                                 |          |                                |
|----------------------------------------------|---------------------------------|----------|--------------------------------|
| ZNF746                                       | transcription regulator         | 4.00E-02 | PPARGC1A                       |
| branched chain amino acids                   | chemical drug                   | 4.00E-02 | PPM1K                          |
| mir-634                                      | microRNA                        | 4.00E-02 | LAMP2                          |
| PIM1                                         | kinase                          | 4.08E-02 | AKT1,PPARGC1A                  |
| STAT4                                        | transcription regulator         | 4.21E-02 | PGP,RAMP2,RGCC,SERTAD1         |
| SIRT6                                        | enzyme                          | 4.22E-02 | AKT1,PPARGC1A                  |
| telmisartan                                  | chemical drug                   | 4.22E-02 | CPT1A,PTH1R                    |
| TCF7L2                                       | transcription regulator         | 4.49E-02 | FBP2,KLHL2,PPARGC1A,TNS1,YPEL2 |
| 3,5-L-diiodothyronine                        | chemical - endogenous mammalian | 4.56E-02 | CPT1A                          |
| CAMKK2                                       | kinase                          | 4.56E-02 | PPARGC1A                       |
| KDM6A                                        | enzyme                          | 4.56E-02 | Uty                            |
| KSR1                                         | kinase                          | 4.56E-02 | PPARGC1B                       |
| OCT4-NANOG                                   | complex                         | 4.56E-02 | TCF7L1                         |
| TRIB1                                        | kinase                          | 4.56E-02 | CPT1A                          |
| cosyntropin                                  | biologic drug                   | 4.56E-02 | DLL4                           |
| miR-217-5p (and other miRNAs w/seed ACUGCAU) | mature microRNA                 | 4.56E-02 | PPARGC1A                       |
| naproxen                                     | chemical drug                   | 4.56E-02 | PTGS1                          |
| oleoylethanolamide                           | chemical - endogenous mammalian | 4.56E-02 | CPT1A                          |
| n-nitrosomethylbenzylamine                   | chemical toxicant               | 4.60E-02 | AP3S1,LAMP2,PTGS1              |

|            |                         |          |                                          |
|------------|-------------------------|----------|------------------------------------------|
| quercetin  | chemical drug           | 4.60E-02 | ACAA2,ECH1,PPARGC1A                      |
| Calmodulin | group                   | 4.63E-02 | PHOSPHO1,YPEL2                           |
| calcitriol | chemical drug           | 4.84E-02 | AKT1,CPT1A,ECH1,PNPT1,RGCC,SLC25A36,XPO1 |
| IKZF1      | transcription regulator | 4.85E-02 | 4732416N19Rik,PTH1R,ZFPM1                |

**Supplementary Table 6. Sequences of the primers used for RT-qPCR**

| Species | Gene         | Forward (5'-3')            | Reverse (5'-3')           |
|---------|--------------|----------------------------|---------------------------|
| Mouse   | <i>18S</i>   | CTTAGAGGGACAAGTGGCG        | ACGCTGAGCCAGTCAGTGTA      |
| Mouse   | <i>Nppb</i>  | AGGGAGAACACGGCATCATT       | GACAGCACCTTCAGGAGAT       |
| Mouse   | <i>Cpt1b</i> | CCCATGTGCTCCTACCAGAT       | CCTTGAAGAAGCGACCTTTG      |
| Mouse   | <i>Il6</i>   | TAGTCCTTCCTACCCCAATTTCC    | TTGGTCCTTAGCCACTCCTTC     |
| Mouse   | <i>Lcad</i>  | GTAGCTTATGAATGTGTGCAACTC   | GTCTTGCGATCAGCTCTTTCATTA  |
| Mouse   | <i>Mcad</i>  | GATCGCAATGGGTGCTTTTGATAGAA | AGCTGATTGGCAATGTCTCCAGCAA |
| Mouse   | <i>Plin5</i> | TGTCCAGTGCTTACAACCTCGG     | CAGGGCACAGGTAGTCACAC      |
| Mouse   | <i>Ppara</i> | AGAGCCCCATCTGTCTCTC        | ACTGGTAGTCTGCAAACCAA      |
| Mouse   | <i>Tnf</i>   | CAGGCGGTGCCTATGTCTC        | CGATCACCCCGAAGTTCAGTAG    |
| Rat     | <i>Acaa2</i> | CAGAGGTGGAAAGCCGCTAA       | TGCTCATCCACTTGCATGGT      |
| Rat     | <i>Nppa</i>  | ATCTGATGGATTTCAAGAACC      | CTCTGAGACGGGTTGACTTC      |
| Rat     | <i>Nppb</i>  | GCTTTGGGCAGAAGATAGACC      | AGAGCTGGGGAAAGAAGAGC      |
| Rat     | <i>Atgl1</i> | CCTGACTCGAGTTTCGGAT        | CACATAGCGCACCCCTTGA       |
| Rat     | <i>Cpt1a</i> | CAGCTCGCACATTACAAGGA       | TGCACAAAGTTGCAGGACTC      |
| Rat     | <i>Lcad</i>  | AACCAAACGTCTGGACTCCG       | GCATCCACGTAGGCTTTTGC      |
| Rat     | <i>Plin5</i> | GGATGTCCGGTGATCAGAC        | GTGCACGTGGCCCTGACCAG      |
| Rat     | <i>Ppara</i> | TCGTGGAGTCCTGGAAGTGA       | CTTCAGTCTTGGCTCGCCTC      |



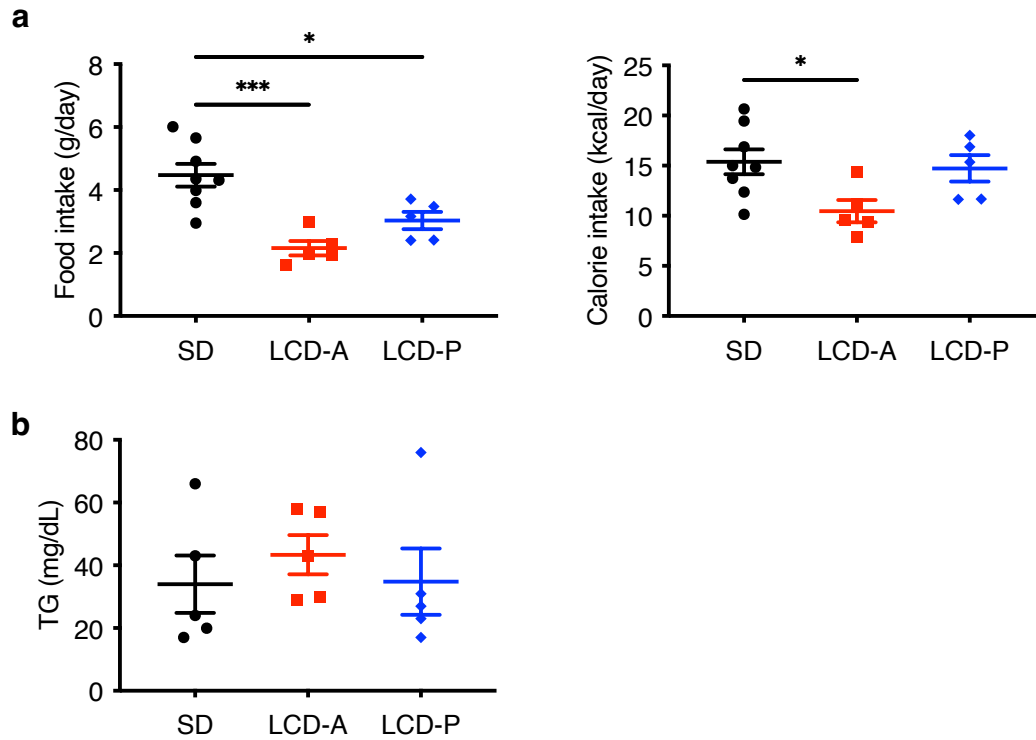

**Supplementary Figure 1. Food intake and serum triglyceride levels among diet groups.**  
**a** Food intake and calorie intake of mice fed the indicated three diets (n = 5-8). **b** Serum triglyceride (TG) levels of mice fed the indicated three diets for 4 weeks (n = 5). Data are shown as mean  $\pm$  SEM. One-way ANOVA followed by Holm-Sidak's post-hoc test. \* $P < 0.05$ , \*\* $P < 0.01$ , \*\*\* $P < 0.001$ .
